# 1 *Genomics of Cryptococcus neoformans*

2 Authors: PM Ashton<sup>1,2</sup>, LT Thanh<sup>1</sup>, PH Trieu<sup>1</sup>, D Van Anh<sup>1</sup>, NM Trinh<sup>1</sup>, J Beardsley<sup>1,2,3</sup>, F

3 Kibengo<sup>4</sup>, W Chierakul<sup>5</sup>, DAB Dance<sup>2,6,15</sup>, LQ Hung<sup>7</sup>, NVV Chau<sup>8</sup>, NLN Tung<sup>8</sup>, AK Chan<sup>9,10</sup>, GE

4 Thwaites<sup>1,2</sup>, DG Lalloo<sup>11</sup>, C Anscombe<sup>1,2</sup>, LTH Nhat<sup>1</sup>, J Perfect<sup>12</sup>, G Dougan<sup>13,14</sup>, S Baker<sup>1,2</sup>, S

5 Harris<sup>14</sup>, JN Day<sup>1,2</sup>

6

7 1. Oxford University Clinical Research Unit, Wellcome Trust Asia Programme, 764 Vo Van

8 Kiet, Ho Chi Minh City, Viet Nam

9 2. Centre for Tropical Medicine and Global Health, Nuffield Department of Medicine,

10 University of Oxford, UK

11 3. Marie Bashir Institute, University of Sydney, Sydney, Australia.

12 4. MRC/UVRI & LSHTM Uganda Research Unit, Entebbe, Uganda

13 5. Mahidol Oxford Tropical Medicine Research Unit, Bangkok, Thailand

14 6. Lao–Oxford–Mahosot Hospital–Wellcome Trust Research Unit, Vientiane, Laos

15 7. Cho Ray Hospital, Ho Chi Minh City, Vietnam

16 8. Hospital for Tropical Diseases, Ho Chi Minh City, Vietnam

17 9. Sunnybrook Health Sciences Centre, University of Toronto, Toronto, Canada

18 10. Dignitas International, Zomba, Malawi

19 11. Liverpool School of Tropical Medicine, Liverpool, UK

20 12. Division of Infectious Diseases, Department of Medicine and Department of Molecular

21 Genetics and Microbiology, Duke University, North Carolina, USA

22 13. Wellcome Trust-Cambridge Centre for Global Health Research, Cambridge, UK

23 14. Pathogen Genomics, The Wellcome Trust Sanger Institute, Wellcome Trust Genome

24 Campus, Cambridgeshire, UK

25 15. Faculty of Infectious and Tropical Diseases, London School of Hygiene and Tropical

26 Medicine, London, UK

## 27 Abstract

28 *C. neoformans* var. *grubii* (*C. neoformans*) is an environmentally acquired pathogen causing 181 000  
29 HIV-associated deaths each year. We used whole genome sequencing (WGS) to characterise 699  
30 isolates, primarily *C. neoformans* from HIV-infected patients, from 5 countries in Asia and Africa. We  
31 found that 91% of our clinical isolates belonged to one of three highly clonal sub-clades of VN1a,  
32 which we have termed VN1a-4, VN1a-5 and VN1a-93. Parsimony analysis revealed frequent, long  
33 distance transmissions of *C. neoformans*; international transmissions took place on 13% of VN1a-4  
34 branches, and intercontinental transmissions on 7% of VN1a-93 branches. The median length of  
35 within sub-clade internal branches was 3-6 SNPs, while terminal branches were 44.5-77.5 SNPs. The  
36 short median internal branches were partly driven by the large number (12-15% of internal  
37 branches) of polytomies in the within-sub-clade trees. To simultaneously explain our observation of  
38 no apparent molecular clock, short internal branches and frequent polytomies we hypothesise that  
39 *C. neoformans* VN1a spends much of its time in the environment in a quiescent state, while, when it  
40 is sampled, it has almost always undergone an extended period of growth. Infections with VN1a-93  
41 were associated with a significantly reduced risk of death by 10 weeks compared with infections  
42 with VN1a-4 (Hazard Ratio = 0.45,  $p = 0.003$ ). We detected a recombination in the mitochondrial  
43 sequence of VN1a-5, suggesting that mitochondria could be involved in the propensity of this sub-  
44 clade to infect HIV-uninfected patients. These data highlight the insight into the biology and  
45 epidemiology of pathogenic fungi which can be gained from WGS data.

46

## 47 Intro

48 *Cryptococcus neoformans* is an opportunistic fungal pathogen which primarily affects people with  
49 cell mediated immune defects, particularly those living with HIV. There are an estimated 223 100  
50 incident cases of cryptococcal meningitis per year in HIV patients with CD4 counts of less than 100  
51 cells per  $\mu\text{l}$ , resulting in 181 100 deaths (Rajasingham et al. 2017). *C. neoformans* var. *grubii*  
52 (hereafter *C. neoformans*), one of two varieties of *C. neoformans*, accounts for the vast majority of  
53 cryptococcal meningitis cases globally, and particularly in the tropical and sub-tropical regions which  
54 bear the heaviest disease burden (Rajasingham et al. 2017; Park et al. 2009).

55 The population structure of *C. neoformans* consists of at least three lineages, VNI, VNII and VNB.  
56 Two of these, the frequently isolated VNI and the rarely observed VNII, are clonal and globally  
57 distributed (Litvintseva et al. 2006; Khayhan et al. 2013; Ferreira-Paim et al. 2017) while VNB is very  
58 diverse but rarely isolated outside sub-Saharan Africa (Litvintseva et al. 2006) and South America  
59 (Andrade-Silva et al. 2018). Sequencing of strains from patients with relapsed disease has indicated  
60 that microevolution occurs during infection, with typically 0-6 SNPs occurring over a median relapse  
61 period of 146 days (Chen et al. 2017). Other studies have described a broad view of the three main  
62 molecular types, VNI, VNII and VNB, analysing 150-400 total isolates, and placing clinical isolates into  
63 the context of environmental strains (Desjardins et al. 2017; Rhodes et al. 2017; Vanhove et al.  
64 2017). Within VNI, three distinct, but still recombining, sub-lineages have been identified, two of  
65 which (VNIa and VNIb) are globally distributed, while VNIIc is limited to southern Africa. Genomic  
66 data has revealed that VNI and VNII to have more recent migrations than VNB, with nearly clonal  
67 isolates found in disparate geographic regions (Rhodes et al. 2017), although this has not yet been  
68 investigated on a fine scale.

69 So far, our understanding of the population structure of *C. neoformans* in the Asia & Pacific region,  
70 the second highest prevalence region after sub-Saharan Africa (Rajasingham et al. 2017), has been  
71 based upon low resolution methods such as MLST and AFLP (Day et al. 2011; Thanh et al. 2017;  
72 Simwami et al. 2011; Khayhan et al. 2013; Kaocharoen et al. 2013; Hiremath et al. 2008; Day et al.

73 2017). These data show that *C. neoformans* in Southeast Asia is highly clonal, with considerable gene  
74 flow between countries within the region, and less connectivity with other continents (Khayhan et  
75 al. 2013). Recently, the first study focussing on whole genome data from the region has been  
76 reported, which identified 165 Kbp of sequence specific to ST5 (Day et al. 2017), a sequence type  
77 seen more frequently in HIV uninfected patients, the majority of whom have no identified underlying  
78 immune-suppression (Day et al. 2011, 2017). The predilection of ST5 to infect HIV uninfected  
79 patients is not the only reported association between a *C. neoformans* lineage and a clinical  
80 phenotype. Infections with VNB (Beale et al. 2015) and VNI ST93 (Wiesner et al. 2012) have been  
81 reported to have worse outcomes in HIV infected patients in southern Africa and eastern Africa,  
82 respectively.

83 Production of *C. neoformans* spores is thought to be vital to the organism's virulence, as the spores,  
84 alongside desiccated yeast cells are the likely infectious propagule (Velagapudi et al. 2009). There  
85 are two known mechanisms which can result in the generation of *C. neoformans* spores –  
86 heterothallic mating and homothallic fruiting. Both processes involve meiosis resulting in  
87 recombination and other large scale genomic changes such as aneuploidy (Lin and Heitman 2006; Ni  
88 et al. 2013; Lin et al. 2005). While our direct understanding of spore production in *C. neoformans*  
89 comes entirely from the laboratory, evidence of the processes occurring naturally have mostly come  
90 indirectly from population genetics (Litvintseva et al. 2006; Hiremath et al. 2008).

91 Previously, we have undertaken several prospective, descriptive and randomised controlled  
92 intervention trials in Southeast Asia and East/Southeast Africa. Here, we used whole genome  
93 sequence analysis of 699 *Cryptococcus* isolates to describe the population structure of *C.*  
94 *neoformans* causing disease in these populations, in high resolution, and combine this information  
95 with metadata from these trials to relate this to disease phenotype.

## 96 Results

97 We sequenced 699 *Cryptococcus* species complex isolates from Vietnam (n = 441), Laos (n = 73),  
98 Thailand (n = 40), Uganda (n = 132) and Malawi (n = 13). Of these, 682 were *C. neoformans*, 12 were  
99 *C. gattii* and 5 (all from Uganda) were putative hybrids between *C. neoformans* and *C.*  
100 *deneoformans*. There were 696 clinical isolates from 695 patients, and 3 environmental isolates from  
101 Vietnam. All environmental isolates were *C. neoformans*. There were 618 isolates from HIV infected  
102 patients and 78 from HIV uninfected patients. Of the 682 *C. neoformans* there were 681 isolates  
103 with mating type alpha and 1 isolate from Vietnam with mating type a.

### 104 Whole genome sequencing of VNI

105 Six hundred and seventy eight (99.4%) of our *C. neoformans* isolates were VNI; four were VNII  
106 (Supplementary Figure 1, Supplementary Table 1). To provide context for our isolates, all 185 VNI  
107 genomes sequenced by Desjardins *et al.* (160 clinical, 25 environmental, full details available in  
108 Supplementary Table 1) were included in subsequent phylogenetic analyses. We ensured technical  
109 comparability of our methods of phylogenetic analysis with those of Desjardins *et al.* by comparing  
110 our results for the Desjardins data with their reported results (Supplementary Figure 2).  
111 A phylogenetic tree (Figure 1) was derived from the 325812 variant positions in the core genome of  
112 the 863 *C. neoformans* VNI. Of the novel *C. neoformans* isolates presented here, 668 were VNIa  
113 (98.5%), 10 were VNIb (1.5%); none were VNIIc. Figure 1 shows that the population structure of VNIa  
114 is dominated by three common and highly clonal sub-clades, while VNIb and VNIIc are more  
115 heterogenous. VNIa, VNIb and VNIIc isolates were isolated from 14, 10 and 2 countries on 5, 6 and 1  
116 continent(s), respectively (Supplementary Tables 2 & 3). VNIa was predominant, accounting for 548  
117 of 549 (99.8%) isolates in Asia and 163 of 274 (59.5%) strains in Africa. When isolates from  
118 Botswana, an established outlier in terms of *Cryptococcus neoformans* diversity, were excluded, the  
119 proportion of VNIa isolates in Africa was 84.3% (134 out of 159) of all VNI isolates. The H99  
120 reference genome belonged to VNIb.

121 Nine distinct clusters were identified using PCA and K-means clustering (Supplementary Figure 3).  
122 We extended the naming scheme of Desjardins *et al.* to refer to the sub-clades within VN1a as VN1a-  
123 4, VN1a-5, VN1a-93 and VN1a-32 after the predominant MLST sequence type in each clade. Two  
124 clusters contained only isolates with novel STs, which we refer to as VN1a-X and VN1a-Y. The  
125 previously described VN1b and VN1c lineages were also identified as distinct clusters. The remaining  
126 polyphyletic VN1 isolates which did not fall into any PCA cluster we grouped together into VN1-  
127 outlier. The number of each lineage isolated from HIV positive patients from each country are  
128 presented in Table 1.

129 While each country had a dominant or, in the case of Vietnam, co-dominant sub-clade(s), there were  
130 minority sub-clades present in every country analysed (Supplementary Figure 4). For example, VN1a-  
131 93, the dominant lineage in Uganda, was also present in Vietnam (12%). Similarly, Uganda and  
132 Botswana had low prevalence of typically Southeast Asian sub-clades such as VN1a-4 (Uganda =  
133 1.6%, Botswana = 2.9%) and VN1a-5 (Uganda = 6.5%, Botswana = 4.9%).

#### 134 [Phylogenetic analysis of sub-clades within VN1a](#)

135 We performed fine-scale genomic epidemiological analyses of VN1a for every sub-clade with at least  
136 50 isolates from this study, i.e. VN1a-4, VN1a-5 and VN1a-93. These sub-clades accounted for 89.3% of  
137 the total isolates in our study, with VN1a-4 accounting for 41%, VN1a-5 for 29% and VN1a-93 for 20%.  
138 To maximise the phylogenetic resolution within these sub-clades, within sub-clade reference  
139 genomes were generated using PacBio sequencing (available via FigShare  
140 doi:10.6084/m9.figshare.6060686). The median SNP distance of the VN1a-4, VN1a-5 and VN1a-93  
141 strains to the within sub-clade reference genome was 277 (Standard Deviation (SD) = 142), 338 (SD =  
142 236) and 361 (SD = 44) SNPs, compared with 47619 (SD = 196), 46218 (SD = 245) and 48763 (SD =  
143 262) to the H99 reference genome.

144

145

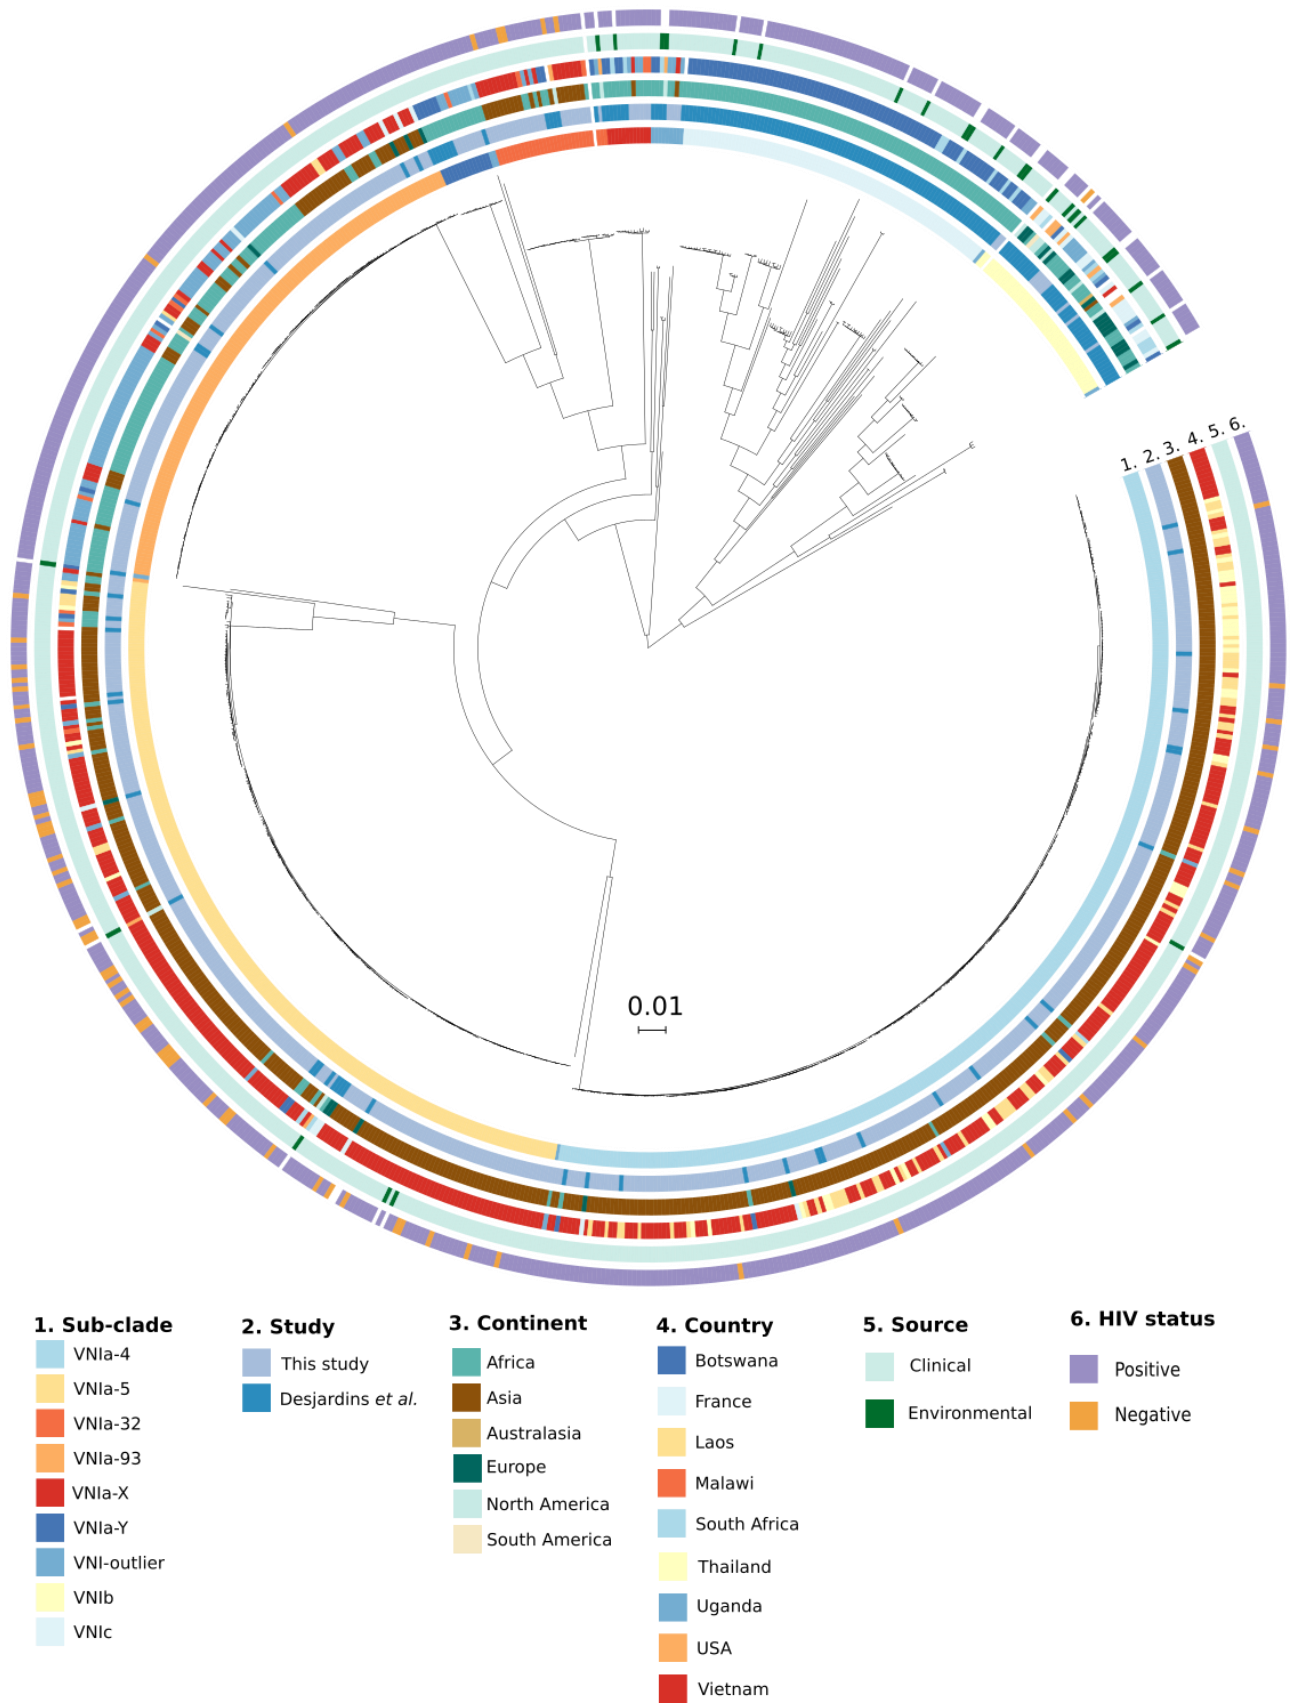

146

147 Figure 1: A whole genome SNP phylogeny of all VNI in this study and Desjardins et al

148

149 Table 1: The frequency of isolation of each VNIa sub-clade from HIV positive patients in each country from both this study and Desjardins et al

| Country      | VNIa-4     | VNIa-5     | VNIa-93    | VNIc      | VNIb      | VNIa-32   | VNIa-Y    | VNIa-X    | VNIa-outlier | Total      |
|--------------|------------|------------|------------|-----------|-----------|-----------|-----------|-----------|--------------|------------|
| Vietnam      | 175        | 129        | 44         |           | 1         | 15        |           | 1         | 1            | 366        |
| Uganda       | 2          | 8          | 84         |           | 10        | 3         | 7         | 3         | 5            | 122        |
| Botswana     | 3          | 5          | 3          | 74        | 2         | 3         | 6         | 3         | 3            | 102        |
| Laos         | 57         | 6          | 2          |           |           |           |           |           |              | 65         |
| Thailand     | 38         | 4          |            |           |           |           |           |           |              | 42         |
| France       | 2          | 4          | 4          |           | 15        |           |           |           |              | 25         |
| S. Africa    | 1          | 1          |            | 6         | 6         |           |           | 2         | 1            | 17         |
| Malawi       |            | 3          | 5          |           |           | 2         | 1         | 2         |              | 13         |
| Togo         |            |            |            |           | 2         |           |           |           |              | 2          |
| India        |            |            |            |           |           | 1         |           |           |              | 1          |
| Brazil       |            |            | 1          |           |           |           |           |           |              | 1          |
| Argentina    |            |            |            |           | 1         |           |           |           |              | 1          |
| Australia    |            |            |            |           | 1         |           |           |           |              | 1          |
| USA          |            | 1          |            |           |           |           |           |           |              | 1          |
| China        |            | 1          |            |           |           |           |           |           |              | 1          |
| Japan        |            | 1          |            |           |           |           |           |           |              | 1          |
| Tanzania     |            |            |            |           |           |           |           |           | 1            | 1          |
| <b>Total</b> | <b>278</b> | <b>163</b> | <b>143</b> | <b>80</b> | <b>38</b> | <b>24</b> | <b>14</b> | <b>11</b> | <b>11</b>    | <b>762</b> |

150



## 151 Recombination Within Sub-Clades

152 Before deriving per sub-clade phylogenies from which genomic-epidemiological characteristics can  
153 be inferred, we quantified the extent to which recombination plays a role in generation of diversity  
154 within sub-clades. Recombination within sub-clades was investigated by assessing the degree of  
155 linkage disequilibrium (LD). LD was assessed for all within sub-clade SNPs with a minor allele  
156 frequency of 0.1 or greater. There was limited decay of LD as assessed by  $R^2$  generated by vcfTools  
157 (Danecek et al. 2011), indicating minimal ongoing recombination (Supplementary Figure 5).

158 Isolates from disparate geographical locations are interspersed within the sub-clade  
159 phylogenies

160 One of the most striking patterns observed in the per-sub-clade phylogenies is the interspersion of  
161 isolates from different countries and different continents throughout the phylogeny (see Figures 2  
162 (A), (B) and (C)), indicating frequent international and intercontinental transmissions. We used  
163 parsimony analysis to quantify the minimum number of international transmission events which  
164 explain the current geographic distribution of strains. VN1a-4 had the largest number of international  
165 transmission events as a proportion of total internal branches (95% CI in parentheses, VN1a-4 = 13%  
166 (11-16%), VN1a-5 = 8% (6-11%), VN1a-93 = 10% (7-14%)), while VN1a-93 had the highest proportion of  
167 intercontinental branches (VN1a-4 = 1% (0-2%), VN1a-5 = 5% (3-7%), VN1a-93 = 7% (5-10%)).

168 Notable within sub-clade phylogenetic features

169 A striking feature of the within sub-clade phylogenies is the combination of long terminal branch  
170 lengths and short internal branches. The median number of SNPs represented by the internal branch  
171 lengths compared with the terminal branch lengths are 4.5 vs 60 for VN1a-4 (P-value from  
172 Kolmogorov-Smirnov test =  $7 \times 10^{-70}$ ), 3 vs 77.5 for VN1a-5 (P-value =  $1 \times 10^{-53}$ ) and 6 vs 44.5 for VN1a-93  
173 (P-value =  $4 \times 10^{-19}$ ) (Supplementary Figure 6).

174

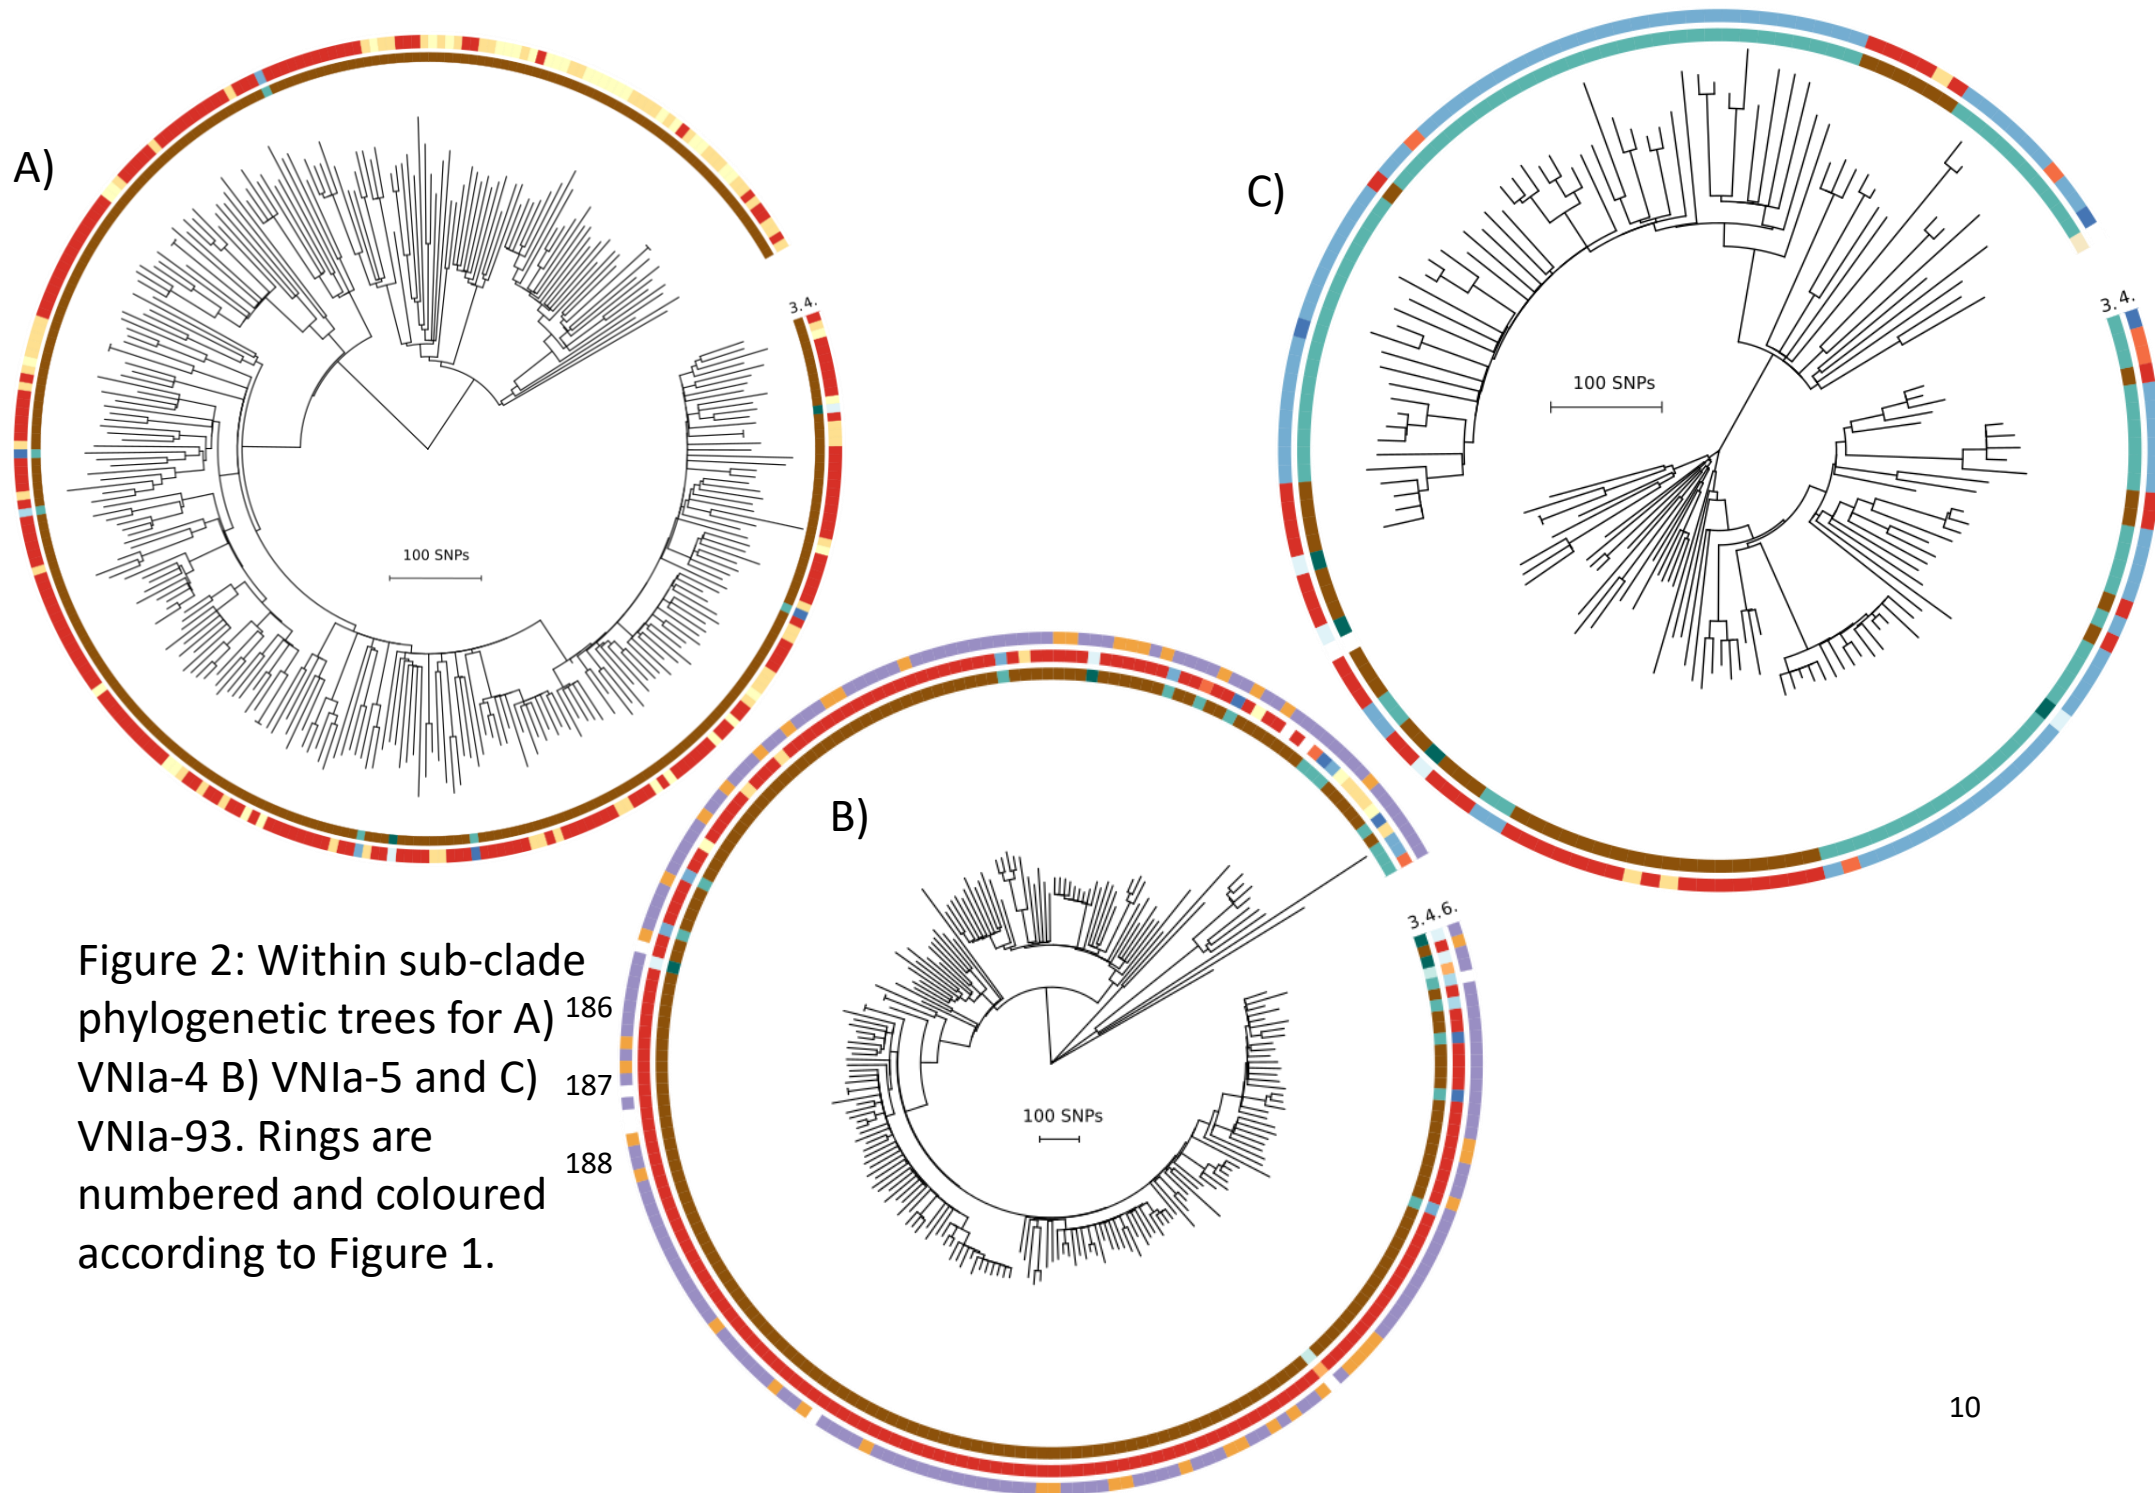

Figure 2: Within sub-clade phylogenetic trees for A) <sup>186</sup> VN1a-4 B) <sup>187</sup> VN1a-5 and C) <sup>188</sup> VN1a-93. Rings are numbered and coloured according to Figure 1.

189 There were a total of 18071, 17593 and 7163 terminal branch SNPs in VNla-4, VNla-5 and VNla-93.  
190 HIV infection status had no significant association with the terminal branch length of ST5 isolates.  
191 We had only 5 environmental strains in our dataset (one VNla-4 and four VNla-5), and they had a  
192 similar mean terminal branch length (75 SNPs). There were 263, 294 and 31 variants (1.5%, 1.8% and  
193 0.4% of total) which occurred more than once on different terminal branches in VNla-4, VNla-5 and  
194 VNla-93. However, most of these (VNla-4, 52%; VNla-5, 60%; and VNla-93, 65%) were in intergenic  
195 regions (i.e. not in coding sequence, 3' or 5' UTR or introns). We manually investigated any gene  
196 containing a variant which occurred as a homoplasy in 3 or more strains for recognised links with  
197 virulence or host interactions, but had no informative hits. The average dN/dS of SNPs in the  
198 terminal branches were 0.84, 0.82 and 0.84 in VNla-4, VNla-5 and VNla-93, respectively.  
199 Another striking feature of the within sub-clade trees was the number of polytomies. All internal  
200 branches that represented 0 SNPs were collapsed, resulting in 78, 65 and 35 collapsed branches in  
201 46, 36 and 21 distinct polytomies (defined as nodes with more than 2 children, after branches of 0  
202 SNPs were collapsed) in VNla-4, VNla-5 and VNla-93, respectively. The collapsed branches as a  
203 proportion of the total number of branches in each sub-clade were 13%, 15% and 12% in VNla-4,  
204 VNla-5 and VNla-93. The median number of branches resulting from a polytomy event was 3 in all  
205 sub-clades, while the maximum was 9, 11 and 6 in VNla-4, VNla-5 and VNla-93, respectively  
206 (Supplementary Table 4). For VNla-4, 14 of 29 (48%) polytomies were international (i.e. strains in the  
207 polytomy were isolated from more than one country) and 1 (3%) of these was intercontinental. For  
208 VNla-5, 10 of 24 (42%) polytomies were international and 6 (25%) were intercontinental. For VNla-  
209 93, 4 of 21 (19%) polytomies were international and 1 (5%) of these was intercontinental. The  
210 maximum time separating the sampling date of two isolates descending directly from the same  
211 polytomy (i.e. not separated via an internal branch representing >0 SNPs) was 10 years for VNla-4,  
212 15 years for VNla-5 and 8 years for VNla-93. The median time range spanned by polytomies was 5.5,  
213 5 and 1 year(s) for VNla-4, VNla-5 and VNla-93, respectively. Genome sequences from isolates from  
214 both our study and that of Desjardins *et al.* belonged to the same polytomies.

## 215 Within Sub-Clade Temporal Patterns

216 The majority of isolates in our study were collected during two clinical trials which recruited patients  
217 between 2004-2010 and 2013-2015 (Supplementary Figure 7A). As the first clinical trial only  
218 recruited patients in Vietnam, this is the only country for which we have considerable temporal  
219 range. This data shows that two sub-clades, VN1a-4 and VN1a-5 have been predominant in every year  
220 in which more than 5 samples were taken since 2004 (Supplementary Figure 7B). The prevalence of  
221 VN1a-32 appears to have declined, in 2004 it accounted for 12% (4/34) of *C. neoformans* collected,  
222 while there were no cases of this sub-clade observed in 2014 (0/40), the last year of collection.  
223 We found a lack of clock like evolution within all three sub-clades. The slope of the trend-line  
224 between time of isolation and root to tip distance was negative for both VN1a-4 and VN1a-5. There  
225 was a poor correlation between time of isolation and distance from the root in the tree for all three  
226 sub-clades (correlation co-efficient -0.07, -0.22 and 0.32 for VN1a-4, VN1a-5 and VN1a-93)  
227 (Supplementary Figure 8).

## 228 Evidence of genome re-arrangement

229 The median number of genome re-arrangements between pairs of VN1a-4, VN1a-5 and VN1a-93  
230 isolates were 10, 7 and 3, respectively. There was no significant association between SNP distance  
231 between isolates and the number of re-arrangements in VN1a-4, VN1a-5 or VN1a-93 (Supplementary  
232 Figure 9). There was also no association between the number of polytomies which occurred since  
233 the most recent common ancestor (MRCA) of the two isolates and the number of genome re-  
234 arrangements between the isolates (Supplementary Figure 10)

## 235 Genome sequence and clinical features

### 236 Association between sub-clade and outcome

237 We used data from our recent randomised controlled trials of treatment for HIV-associated  
238 cryptococcal meningitis patients to define the effect of sub-clade on survival until 10 weeks or 6  
239 months after randomisation. We used a Cox proportional hazards regression model with sub-clade

240 as the main covariate, adjusted for country and treatment. Complete data were available from 530  
241 patients. The survival over 6 months is illustrated in Figure 4. Infections with VNla-93 were  
242 associated with a significantly reduced risk of death by both 10 weeks and 6 months (hazard ratios  
243 (HR) 0.45 95%CI 0.26 to 0.76,  $p = 0.003$  and 0.60, 95%CI 0.39 to 0.94,  $p=0.024$ , respectively)  
244 compared with lineage VNla-4 infections. There were no differences in outcomes between infections  
245 with VNla-4 and any other lineage (See Supplementary Tables 5 and 6).

#### 246 Association between VNla-5 and HIV uninfected patients

247 Vietnam was the only country with more than 10 isolates of *C. neoformans* from HIV uninfected  
248 people. Therefore, only isolates from Vietnam were included in this analysis. Thirty five percent of  
249 HIV infected patients were infected with VNla-5, compared with 75% of HIV uninfected patients  
250 (Fishers exact test, odds ratio 5.4, 95% CI 2.8-10.8,  $P < 10^{-8}$ ). Isolates from HIV uninfected patients  
251 are interspersed throughout the entire VNla-5 phylogeny, implying all strains of this cluster could  
252 potentially cause infection in such hosts.

253

254

255  
256  
257  
258  
259  
260  
261  
262  
263  
264  
265  
266  
267

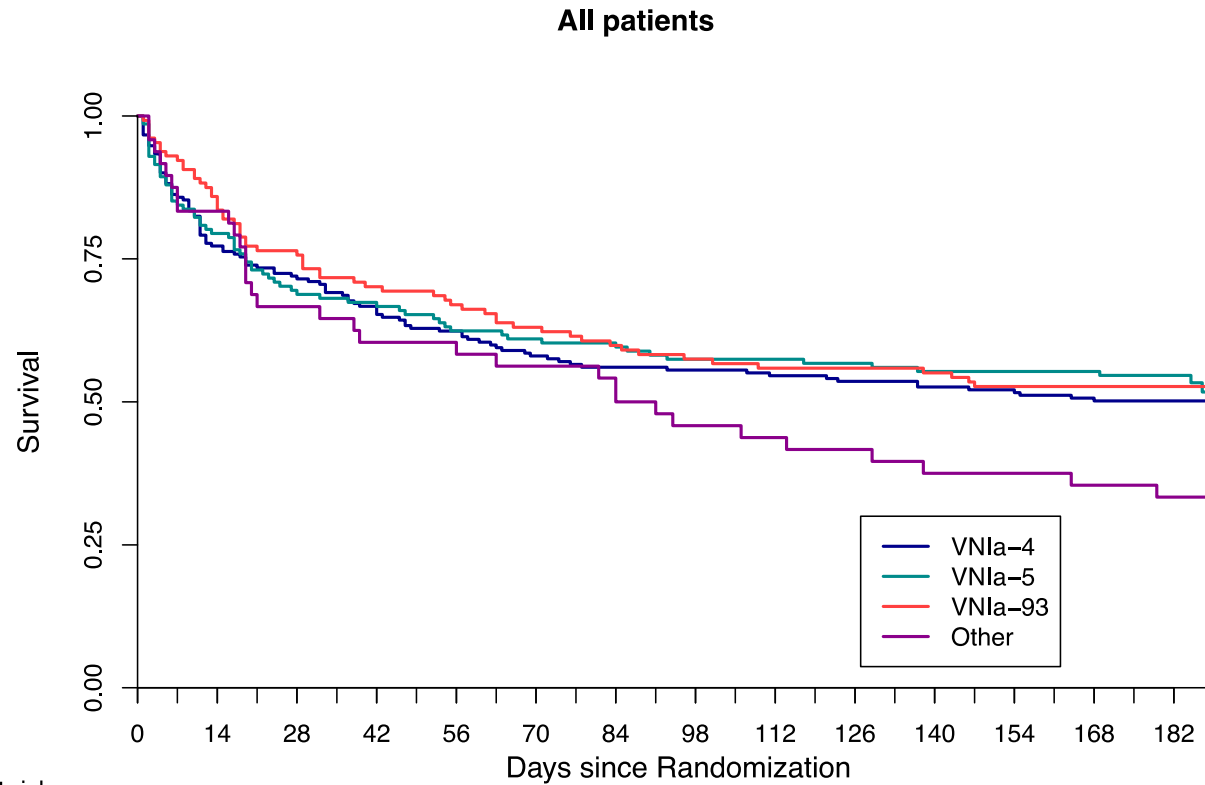

| No. at risk |     | Days since Randomization |     |     |     |     |     |     |     |     |     |     |     |     |     |  |
|-------------|-----|--------------------------|-----|-----|-----|-----|-----|-----|-----|-----|-----|-----|-----|-----|-----|--|
|             |     | 0                        | 14  | 28  | 42  | 56  | 70  | 84  | 98  | 112 | 126 | 140 | 154 | 168 | 182 |  |
| VNIa-4      | 211 | 163                      | 150 | 139 | 129 | 119 | 114 | 113 | 111 | 109 | 107 | 106 | 103 | 85  |     |  |
| VNIa-5      | 142 | 112                      | 98  | 95  | 88  | 86  | 85  | 81  | 81  | 80  | 78  | 78  | 78  | 66  |     |  |
| VNIa-93     | 129 | 109                      | 97  | 89  | 85  | 80  | 75  | 72  | 70  | 70  | 69  | 66  | 65  | 52  |     |  |
| Other       | 48  | 40                       | 32  | 29  | 29  | 27  | 26  | 22  | 21  | 20  | 18  | 18  | 17  | 13  |     |  |

Figure 4: Kaplan-Meier survival estimates up to 6 months for all 530 HIV infected patients enrolled in one of two clinical trials (Day et al., 2016; Beardsley et al., 2016) with whole genome sequencing results for their infecting isolate.

269

## 270 VNla-5 defining SNPs

271 Due to the association between VNla-5 and disease in HIV uninfected patients, we were interested  
272 in SNPs which define VNla-5. Ancestral sequence reconstruction identified 7465 SNPs between the  
273 'origin' of VNla-5 and the MRCA of VNla-5 which were 95% sensitive and specific for VNla-5. There  
274 were 1868 non-synonymous SNPs, distributed among 1220 genes. The dN/dS ratio was calculated  
275 for all genes with SNPs on the VNla-5 defining branch, there were no genes known to be associated  
276 with virulence or interaction with the host that had extremes of dN/dS ratio. The overall dN/dS ratio  
277 of genic SNPs on this branch was 0.33, compared with the SNPs on the VNla-4 defining branch which  
278 had an overall dN/dS of 0.38. There were seven genes with nonsense SNPs, introducing premature  
279 stop codons into five hypothetical proteins, one E3 ubiquitin-protein ligase (CNAG\_04262) and a  
280 metacaspase, a cysteine protease involved in cell apoptosis (CNAG\_06787).

## 281 Mitochondrial sequence

282 A maximum likelihood phylogeny was derived for the SNPs identified in the mitochondrial DNA  
283 (mtSNP) of *C. neoformans* VNI (Supplementary Figure 11 B). When the mtSNP tree was compared  
284 with the whole genome SNP (wgSNP) tree (Supplementary Figure 11 B), some sub-clades were  
285 phylogenetically congruous, while others were not. VNla-4, VNla-5, VNla-32, and VNla-Y were all  
286 monophyletic within the mtSNP tree, in agreement with the whole genome SNP tree  
287 (Supplementary Figure 11 A). For VNla-93, 144 out of 145 isolates were paraphyletic, with the  
288 monophyletic VNla-32 and VNla-Y nested within the VNla-93 genotype, while VNla-X was identical to  
289 the majority mtSNP genotype of VNla-93. In the mitochondrial phylogeny VNlb is paraphyletic, giving  
290 rise to two sub-clades of VNlc, the first contained 19 isolates while the second is a singleton, and two  
291 VNI-outlier isolates. The most parsimonious description for VNlc is polyphyletic, with 8 different  
292 mono or paraphyletic groups. Otherwise, the paraphyletic grouping of all VNlc includes 648 isolates,  
293 only 89 of which are VNlc.  
294 The most striking incongruity between the mtSNP and the whole genome data was in the placement  
295 of VNla-5. In the whole genome tree, VNla-5 is within the VNla group with VNla-4 as its sister taxa. In



296 contrast, in the mtSNP tree, VNla-5 is an outgroup, even in relation to VNlb and VNlc. There was a 28  
297 bp sequence, intergenic between CNAG\_09008 and CNAG\_09009 (positions 19441 to 19469 of the  
298 mtSNP sequence, NC\_018792.1), which contained 8 variants, present in every VNla-5 in the dataset.  
299 This sequence begins 280 bp downstream of the 3' end of CNAG\_09008 and terminates 200 bp  
300 upstream of CNAG\_09009. It had a per-site substitution rate of 0.28 compared with 0.004 for the  
301 VNla-5 mitochondrial sequence as a whole. None of the variant positions were shared by any other  
302 *C. neoformans* strain, or by *C. deneoformans* JEC21 (GCA\_000091045) or *C. gattii* R265  
303 (GCA\_000149475). When the putative recombinant region was compared against the full nr/nt  
304 BLAST database, the closest hit was to *C. neoformans* H99, chromosome 5 (NC\_026749.1), positions  
305 80207 to 80234, which had 1 bp difference (E-value = 0.004). This closest sequence on chromosome  
306 5 is within CNAG\_06848 which is widely conserved in the fungal kingdom. CNAG\_06848 is a 222 bp  
307 gene encoding an 'ATP synthase subunit 9, mitochondrial'. There were no strains in our dataset with  
308 SNPs in CNAG\_06848 which could indicate a reciprocal recombination event. The assembly of the  
309 pacbio sequenced VNla-5 genome also showed the presence of the highly variable region in the  
310 mitochondrial genome

## 311 Discussion

312 We sequenced 699 isolates of *C. neoformans* covering 19 years and 5 countries on 2 continents, with  
313 most isolates derived from two large clinical trials. We integrated our novel data with previously  
314 published data (Desjardins et al. 2017) to provide extra context for our original findings. This context  
315 allowed us to assign 99.4% of the *C. neoformans* isolates sequenced as part of this study to the  
316 global clade VNI (Litvintseva et al. 2006; Khayhan et al. 2013; Ferreira-Paim et al. 2017). According to  
317 the nomenclature established by Desjardins et al. 98.5% of our isolates belonged to VNla, compared  
318 with 30% of clinical VNI isolates and 18.5% of all isolates sequenced by Desjardins. To some extent,  
319 this difference is to be expected due to the focus of Desjardins et al. on both VNI and VNB, and their  
320 intensive sampling of Botswana, a known outlier in terms of *Cryptococcus* diversity (Litvintseva et al.



2006). This dominance of VN1a in our samples is interesting for two reasons. Firstly, it begs the question, are there specific biological properties of VN1a, or of VN1a-4, VN1a-5 and VN1a-93 which underlie their success? Secondly, the *C. neoformans* reference strain, H99, belongs to VN1b, which accounts for fewer than 1.5% of the clinical isolates in our study. We suggest that it may be useful to the *Cryptococcus* research community to consider including more representative isolates (i.e. from VN1a) in detailed laboratory investigations.

### There is very little novel diversity observed in the *C. neoformans* in our study

Even though 98.5% of our isolates were VN1a, we observed little additional diversity within VN1a that was not also observed in the much smaller number of VN1a isolates sequenced by Desjardins et al. This is due to the presence in our isolate collection of a small number of very common, highly clonal sub-clades. The three most common sub-clades (VN1a-4, VN1a-5 and VN1a-93) accounted for 92% of *C. neoformans* sequenced in this study. When there are a lot of internal nodes near the tips of the tree, it means that you either have high extinction rates or recently increased growth rate (Pybus et al. 2002). High extinction rate could be due to a relatively rapid decline in the ability of *C. neoformans* cells to germinate over time, while a recently increased growth rate could be due to exploitation of a new niche, such as the HIV infected human host.

### *C. neoformans* undergoes frequent transfers between continents

The phylo-geography of VN1a is characterised by each lineage being predominantly but not exclusively found in a single country or continent. While our sampling is exclusively from Asia and Africa, and is therefore not globally representative, VN1a-4 and VN1a-5 were predominantly Asian (97% and 89%), and VN1a-93 was predominantly African (64%). This finding is consistent with previous reports, with particular STs having been reported to be more common in certain countries, regions, or continents (Khayhan et al. 2013; Litvintseva et al. 2006; Ferreira-Paim et al. 2017). However, whole genome sequencing provides us with extra resolution in resolving whether, for example, the 7% of VN1a-5 strains in Africa are the result of a single introduction or multiple discrete

346 introductions. To address this question, we generated within sub-clade reference genomes using  
347 PacBio sequencing and performed within sub-clade phylogenetic analyses. Examination of the within  
348 sub-clade phylogenetic trees (Figure 2) and parsimony analysis shows that international and  
349 intercontinental transmission is a frequent event, with 8-13% of internal branches representing an  
350 international transmission.

351 While nearly clonal isolates have been identified in disparate locations by a recent study (Rhodes et  
352 al. 2017), the authors focussed more on exploring ancient migrations. Our data dramatically  
353 illustrate the extent of this on-going intercontinental migration and we offer two alternative  
354 explanations. The first potential explanation is that transmission between countries or continents  
355 occurs during latent infection, i.e. a patient is exposed in one country, and then travels to another  
356 country where they develop illness and are sampled. Such long distance latent transmission has  
357 been hypothesised previously (Garcia-Hermoso et al. 1999). Unfortunately, we do not have  
358 extensive travel/residence histories for our patients and thus cannot directly address this  
359 hypothesis. However, historically there has not been large scale migration between Southeast Asia  
360 and South/East Africa (Kuyper 2008), suggesting that this hypothesis is insufficient to explain the  
361 high frequency of transmissions. A second, broad hypothesis to explain the large number of  
362 transmission events is that they are mediated by environmental factors, either 'natural' or human  
363 influenced. Potential natural environmental factors would include air currents or migratory birds;  
364 pigeons specifically are considered the most probable vector for global dissemination (Lin and  
365 Heitman 2006). Human activities that link the environments of East/Southeast Africa and Southeast  
366 Asia include trade in lumber, rice, exotic animals, and illegal animal products such as those used in  
367 traditional medicine e.g. ivory ([http://www.aljazeera.com/news/2016/11/exclusive-vietnam-double-](http://www.aljazeera.com/news/2016/11/exclusive-vietnam-double-standards-ivory-trade-161114152646053.html)  
368 [standards-ivory-trade-161114152646053.html](http://www.aljazeera.com/news/2016/11/exclusive-vietnam-double-standards-ivory-trade-161114152646053.html)). While we cannot directly address this hypothesis  
369 with our data, airborne spread is well established as a long distance dispersal mechanism for plant  
370 pathogens (Brown 2002). Intuitively it might seem unlikely that long distance airborne dispersal of  
371 fungal pathogens occurs frequently. However if airborne spore dispersal conforms to a non-

372 exponentially bound (or ‘fat-tailed’) distribution model rather than an exponential model, long  
373 distance dispersions will occur relatively frequently (Brown 2002; Shaw 1994). Weather patterns are  
374 a proto-typical example of such ‘fat-tailed’, ‘chaotic’ (small differences in initial conditions, leading  
375 to large differences in outcome) distributions (Lorenz 1963). However, effective quantification of the  
376 potential contribution of airborne dispersal is complex (Meyer et al. 2017) and beyond the scope of  
377 this paper. Overall, we consider environmental factors to be the better explanation because (i)  
378 *Cryptococcus* is fundamentally an environmental organism (ii) there is limited human migration  
379 between Southeast Asia and East/Southeast Africa and (iii) long distance dispersal by environmental  
380 factors, including wind, is well established for fungal pathogens.

381 We found no correlation between root-to-tip phylogenetic distance and time since isolation in any of  
382 the three main VN1a sub-clades. One reason for the lack of a molecular clock could be the fact that *C.*  
383 *neoformans* can enter a quiescent state, in the form of hardy spores. The lack of molecular clock  
384 indicates *C. neoformans* spends enough time in the quiescent state to efface the clock-like signal, at  
385 least over the relatively short time scale sampled here. The lack of molecular clock has also been  
386 reported for the spore-forming bacterium *Bacillus anthracis* (Sahl et al. 2016).

387 *C. neoformans* internal branches are very short compared with the terminal branches

388 A striking feature of all three within sub-clade phylogenies (VN1a-4, VN1a-5 and VN1a-93) was the  
389 difference between the length of the internal branches and the terminal branches. Median internal  
390 branch lengths were between 3 and 6 SNPs, while median terminal branch lengths were 44.5-77.5  
391 SNPs. Long terminal branches are to be expected in an environmentally acquired organism, with no  
392 human-to-human transmission, but the contrast between these long terminal branches and the  
393 short internal branches is striking. Since the human host is considered a dead end for *C. neoformans*  
394 life-cycle, it is likely that most of the accumulation of variation represented by the internal branches  
395 occurred in the environment, rather than within humans. The short average internal branch  
396 indicates that *C. neoformans* VN1a does not generally acquire a lot of substitutions in the  
397 environment, implying a lack of cellular division and growth. In contrast, the terminal branches are

398 almost all long, due to observed substitutions, and substitutions imply cell division. This leads to an  
399 apparent contradiction, as the terminal branches of the 5 environmental isolates in VN1a-4, VN1a-5  
400 and VN1a-93 from our study and Desjardins et al. represent, on average, 75 SNPs. Therefore, to  
401 resolve this contradiction, we propose a scenario where *C. neoformans* VN1a is typically quiescent in  
402 the environment, and as a pre-condition for being cultured from the environment it must be  
403 recently derived from a population which is actively growing. This hypothesis could be tested by  
404 comparing the culture positive rates for *C. neoformans* from the environment, with positive rates by  
405 molecular testing e.g. PCR from the same samples. A higher number of positives for molecular  
406 testing compared with culture would support our hypothesis.

407 What are the implications of this idea for the clinical isolates which make up most of our cases?  
408 What we know is that the vast majority of clinical isolates have long terminal branches and that this  
409 amount of growth does not frequently occur in the environment. Therefore, the long terminal  
410 branches either occur within the patient, or are a pre-condition for infection of the human lung. We  
411 investigated the idea that, if the SNPs occur in patient the organisms may be evolving under  
412 pressure from the host, as has been observed for *C. neoformans* (Chen et al. 2017). The dN/dS of the  
413 SNPs in the terminal branches was consistent between sub-clades, ranging between 0.82-0.84  
414 compared with the even lower dN/dS of SNPs in the long branches defining VN1a-4 (dN/dS = 0.38)  
415 and VN1a-5 (dN/dS = 0.33). This shows that SNPs in the terminal branches are relatively permissive of  
416 non-synonymous SNPs. This could be due to the SNPs occurring in an environment with relatively  
417 high positive selection, or more likely because there has been less time for mildly deleterious non-  
418 synonymous mutations to be lost. A small proportion (1.5%, 1.8%, 0.4%) of terminal branch SNPs  
419 were homoplasies. It is interesting that the majority of homoplasies were in intergenic regions,  
420 considering that according to standard models, these should be under weak or no selective pressure.  
421 It is possible that these intergenic regions have an unidentified regulatory role, as has recently been  
422 proposed for bacteria (Thorpe et al. 2017; Hammarlöf et al. 2018), or the homoplasies could be the  
423 result of recombination.

424 While we cannot put an accurate molecular clock to this dataset, it has been reported that within  
425 patients there is accumulation of 1 SNP every 58 days (Chen et al. 2017). If this rate holds for the  
426 terminal branches in our analysis then the average terminal branch represents between 7 and 12  
427 years. This is an unfeasible length of time for a patient to have an uncontrolled *C. neoformans*  
428 infection, so either there is growth during latency or the substitution rate accounting for the  
429 terminal branch SNPs is higher than that reported by Chen *et al.* or much of the terminal branch  
430 mutation occurs outside the infected human.

### 431 [Large numbers of polytomies in \*C. neoformans\* phylogeny](#)

432 One reason behind the short average internal branch length was the high number of polytomies in  
433 each sub-clade. A polytomy is a section of a phylogeny that cannot be fully resolved into  
434 dichotomous branching events. When observed in a phylogeny, they can either be due to a lack of  
435 information which allows the true relationship to be revealed (a 'soft' polytomy) or due to more  
436 than 2 simultaneous 'speciation' events (a 'hard' polytomy). As we are using reference genomes that  
437 are on average 277-361 SNPs from the isolates, in a ~19 Mbp genome, it seems unlikely that we are  
438 lacking SNP information that would resolve these polytomies. The lowest percentage coverage of  
439 the H99 reference genome in our analysis was 95%, indicating that the vast majority of the genome  
440 is being interrogated in these analyses. Therefore, the large numbers of polytomies we have  
441 observed are likely to be hard polytomies. Of course, at this fine scale, they are not speciation  
442 events, but rather the seeding of numerous progeny by a genetically homogenous population with  
443 no or very limited intermediate growth (if there was lots of intermediate growth, there would be  
444 accumulation of substitutions).

445 These polytomies occurred throughout the sub-clade trees, both near the tips and deeper in the  
446 tree. We showed that the isolates arising directly (i.e. immediate inferred ancestor was a polytomy)  
447 from the same polytomy could be remarkably diverse in their spatio-temporal distribution. The  
448 maximum difference in isolation time between two isolates arising from the same polytomy was 10  
449 years, and the average ranged between 1 and 5.5 years for the different sub-clades. This temporal

450 spread is not that surprising, considering the extended latent period of infection, and the lack of  
451 molecular clock in *C. neoformans*. What is more surprising is that 14-49% of polytomies result in  
452 infections of patients from different countries, and 3-25% result in infections of patients on different  
453 continents. This means that polytomies are unlikely to be entirely explained by exposure of all  
454 patients to the same point source of infectious propagules. One biological process which could  
455 explain these polytomies is long distance transmission of quiescent propagules. In other published  
456 studies, there were very few phylogenetically informative SNPs (two between 10 strains) reported in  
457 *Cryptococcus gattii* VGIIa, although the authors ascribed this to lack of sampling; it is unclear to us  
458 how the addition of further isolates will provide information which further differentiates these  
459 published sequences (Billmyre et al. 2014). Polytomies have been observed in phylogenetic analysis  
460 of *Bacillus anthracis* (Sahl et al. 2016), which also forms spores. A similar pattern of long terminal  
461 branches and short internal branches can be seen in the spore forming *C. difficile* (Knetsch et al.  
462 2017).

463 Desjardins et al. established that there is still recombination on-going within VNIa. However, within  
464 each sub-clade, recombination appears to be a relatively minor contributor of genetic diversity. LD  
465 decay over genomic distance was minimal in all three sub-clades, although the small number of SNPs  
466 with a Minor Allele Frequency > 0.1 (due to short internal branches) means that this analysis was not  
467 well powered.

#### 468 *Is the C. neoformans spore the quiescent propagule?*

469 We present multiple strands of evidence (polytomies, difference between internal and terminal  
470 branch lengths, lack of molecular clock, long distance dispersal) which indicate that a quiescent  
471 phase is important in the epidemiology of *Cryptococcus neoformans*. The most obvious candidate for  
472 this quiescent stage is the well described *Cryptococcus neoformans* spore, which can be produced by  
473 either mating or fruiting. Due to the preponderance of one mating type, it is more likely that same  
474 sex fruiting is responsible for spore generation than mating (Lin et al. 2005). High rates of  
475 recombination have been reported during both fruiting and mating (Lin et al. 2005; Ni et al. 2013).

476 However, in our data there was limited within sub-clade recombination, consistent with the lack of  
477 recombination within closely related outbreak clades of *C. gattii* in the Pacific Northwest (Billmyre  
478 et al. 2014). There was also limited genome re-arrangement, and little correlation between the  
479 number of SNPs and the number of genome re-arrangements.

480 Our failure to identify significant recombination leads us to believe that either fruiting is not the  
481 phenomenon which produces quiescent propagules or our results suffer from technical bias due to  
482 use of short read assemblies to detect genome re-arrangements. The *C. neoformans* genome is rich  
483 in transposons, which would be expected to break a short-read assembly, therefore transposon  
484 mediated re-arrangements (Idnurm et al. 2005) may not be detected by our analyses. Therefore,  
485 long read (Oxford Nanopore or Pacbio) sequencing should be used to address this technical  
486 explanation. Our data highlight an inconsistency in the literature between the clonal nature of  
487 globally distributed VNI and the putative role of spores in the natural history of cryptococcosis when  
488 recombination is expected to occur in both fruiting and mating. An alternative quiescent propagule  
489 which has been previously described in *C. neoformans* is desiccated yeast cells. Although minimal  
490 work has been done on this cell type, there is no obvious requirement for genetic re-arrangements  
491 during the desiccation process.

#### 492 [Association between lineage and clinical features](#)

493 We observed two associations between lineage and clinical phenotype. Firstly, the previously  
494 described association between VN1a-5 and the infection of HIV uninfected patients (Day et al. 2017)  
495 and secondly, the novel finding of a significantly lower risk of death at 10 weeks in patients infected  
496 with VN1a-93, in contrast to previous findings (Wiesner et al. 2012).

497 One interesting difference between the VN1a-5 isolates and the rest of VN1a was identified in the  
498 mitochondrial sequence. We observed a small recombination event which introduced 8 SNPs which  
499 were present in every VN1a-5 isolate and absent in every non-VN1a-5 isolate. The most likely  
500 candidate for the donor sequence was chromosome 5 of the *C. neoformans* nuclear genome, which  
501 encodes a sequence which varies by only 1 bp from the 21 bp putative recombinant fragment. While

502 this has not been previously described in the literature, since these positions were not mixed, and  
503 the reads containing the divergent sequence mapped well to the mtDNA, we deem it likely that the  
504 mitochondrial sequence has been accurately re-constructed, while the origin of the divergent  
505 sequence is much less certain. That this change occurs in the mitochondrion is particularly intriguing  
506 as changes in mitochondrial morphology have been reported as underlying the hyper-virulence of  
507 the Vancouver outbreak *C. gattii* (Ma et al. 2009; Voelz et al. 2014). The putative recombination is in  
508 an intergenic region of the mitochondrion so if this variant underlies a modified phenotype, it is  
509 likely driven by changes in gene expression. Fungal mitochondrial 5' untranslated leader sequences  
510 have been described between 81 to 220 bp in length (Schäfer 2005), while the putative  
511 recombination occurs 200 bp upstream of CNAG\_09009.

512 In summary, the analysis of 699 *Cryptococcus* genomes has revealed that clinical isolates of *C.*  
513 *neoformans* from Vietnam, Laos, Thailand, Uganda and Malawi are concentrated in three main sub-  
514 clades. The phylogenetic structure indicates that there is either a high extinction rate in isolates  
515 causing human infections, or there has been a recent rapid expansion e.g. into a new niche such as  
516 HIV infected people. While it is frequently transmitted between continents, it likely spends the  
517 majority of it's time in the environment in a quiescent state, but has always undergone a significant  
518 period of growth when cultured from the environment or infected people. We also show that VN1a-  
519 93, which has previously been associated with poorer outcomes is associated with a significantly  
520 reduced risk of death by 10 weeks compared with VN1a-4. We show that genome sequencing for  
521 fungal pathogens can provide insight into diverse clinical, epidemiological and ecological features.

## 522 [Materials and Methods \(1188\)](#)

### 523 [Strain Selection](#)

524 The Vietnamese isolates (N=441) were clinical isolates from the cerebrospinal fluid (CSF) of patients  
525 enrolled in a prospective, descriptive study of HIV-uninfected patients with central nervous system  
526 (CNS) infections (n=67) enrolled between 1997 and 2014, a randomized controlled trial of antifungal



527 therapy in HIV-infected patients between 2004 and 2011, the CryptoDex trial, and 3 environmental  
528 isolates from Ho Chi Minh City, Vietnam (Beardsley et al. 2016; Chau et al. 2010; Day et al. 2011, 2013).  
529 The whole genome sequences of 8 Vietnamese strains in this analysis have been previously reported  
530 (Day et al. 2017). Lao isolates were from 73 patients with invasive cryptococcal infection admitted to  
531 Mahosot Hospital, Vientiane, between 2003 and 2015, including 5 from the CryptoDex trial. Isolates  
532 from Uganda (132), Malawi (13) and Thailand (40) were all from HIV infected patients enrolled into  
533 the CryptoDex trial (Beardsley et al. 2016). Sixty-nine isolates from Vietnam and 8 from Laos were  
534 derived from patients not known to be infected with HIV. All clinical trials had ethical approval from  
535 the local IRB in each centre and from the Oxford Tropical Ethics Committee.

### 536 [Micro and molecular biology](#)

537 Isolates were revived from storage by incubation on Sabouraud's agar at 30°C for 72 h. Single  
538 colonies were spread for confluent growth and incubated at 30°C for 24 h. For Illumina sequencing,  
539 genomic DNA was extracted from approximately 0.5 g (wet weight) of yeast cells using the  
540 MasterPure Yeast DNA purification kit (Epicentre, USA) according to manufacturer's instructions.  
541 Whole genome sequencing was carried out on Illumina HiSeq 2000 at the Sanger Institute UK, and  
542 commercially through Macrogen, Korea using the HiSeq 4000 platform. DNA for PacBio sequencing  
543 was extracted according to the protocol in Supplementary methods which was modified from  
544 [dx.doi.org/10.17504/protocols.io.ewtbfen](https://doi.org/10.17504/protocols.io.ewtbfen). PacBio sequencing was performed by Macrogen, Seoul,  
545 Korea, for 20kb SMRT library production, with 2 SMRT cells per sample, according to the  
546 manufacturer's instructions.

### 547 [Species identification, principal components analysis](#)

548 Species identification was carried out using mash screen function (Ondov et al. 2016) comparing the  
549 sample FASTQs against the whole refseq database. For the principal components analysis all variant  
550 positions were loaded into an adegenet (Jombart and Ahmed 2011) (devel branch, commit 43b4360)  
551 genlight object using RStudio. Then the ade4 dudi.pca function was used to determine the principal

552 components. K-means clustering was run on the first two principal components, with values to K  
553 between 2 and 10. The total within-cluster sum of squares was plotted for each K, and the number  
554 of clusters determined as the 'elbow' in the plot of K vs total within-cluster sum of squares. As the  
555 previously described VN1b and VN1c were grouped into one cluster in the analysis of the first two  
556 PCs, the same analysis was carried out on the 3<sup>rd</sup> and 4<sup>th</sup> PCs, which separated these two established  
557 lineages.

## 558 [Phylogenetics analysis](#)

559 FASTQ data were mapped against the H99 reference (GCF\_000149245) using bwa mem (Li 2013),  
560 SNPs were called using GATK v3.3.0 (McKenna et al. 2010) in unified genotyper mode. Positions  
561 where the majority allele accounted for < 90% of reads mapped at that position, which had a  
562 genotype quality of < 30, coverage < 5x, or mapping quality < 30 were recorded as Ns in further  
563 analyses. These steps were carried out using the PHENix pipeline ([https://github.com/phe-  
565 bioinformatics/PHENix](https://github.com/phe-<br/>564 bioinformatics/PHENix)) and SnapperDB (Dallman et al. 2018). Positions in which at least one strain  
566 had a SNP passing quality thresholds were extracted and used as the input for RAxML v8.2.8  
567 (Stamatakis 2014) maximum likelihood phylogenetic analysis. Ancestral state reconstruction was  
568 carried out using IQ-TREE v1.6 (Nguyen et al. 2015). To place our data into the broadest possible  
569 context, we included WGS data from Desjardins *et al.*, 2017. To ensure efficient use of  
570 computational resources, a preliminary phylogenetic analysis was carried out, including all our data  
571 and representatives of VNI, VNBI, VNBII and VNII from Desjardins et al. For polytomy analysis etc3  
572 (Huerta-Cepas et al. 2010) was used to delete/collapse nodes (branches) in the tree that  
573 represented 0 SNPs. Any node in this new tree with collapsed branches with 3 or more children was  
574 defined as a polytomy. Pacbio data was assembled using Canu v1.5 (Koren et al. 2017) and default  
575 parameters, polishing with Illumina data from the corresponding isolate using Pilon v1.22 (Walker et  
al. 2014) for multiple rounds until the number of indels being corrected per round was less than 2.

## 576 Analysis of effect of sub-clade on outcome

577 We assessed the effect of sub-clade on time to death (10 weeks and 6 months) in HIV infected  
578 patients with cryptococcal meningitis with a Cox proportional hazards regression model with sub-  
579 clade as the main covariate. We included all patients with available data from our two randomized  
580 controlled trials. The model was adjusted for country, induction antifungal treatment (amphotericin  
581 monotherapy for 4 weeks, amphotericin combined with flucytosine for 2 weeks, or amphotericin  
582 combined with fluconazole for 2 weeks) and the use of adjunctive treatment with dexamethasone  
583 (Beardsley et al. 2016; Day et al. 2013). We tested the proportional hazard assumption based on  
584 scaled Schoenfeld residuals. Since we knew from the Cryptodex trial that the covariate  
585 dexamethasone does not satisfy this assumption, we included a time varying coefficient for  
586 dexamethasone use.

587

## 588 Recombination analysis

589 Recombination analysis was carried out independently for VN1a-4, VN1a-5 and VN1a-93. Linkage  
590 disequilibrium ( $R^2$ ) was calculated on a per-lineage basis using vcftools v0.1.14 (Danecek et al. 2011)  
591 and the `-geno-r2` option and a minimum allele frequency (MAF) of 0.1, LD was grouped in 100000 bp  
592 windows as there were not many SNPs with a MAF > 0.1 within sub-clades due to the short internal  
593 branches.

## 594 Genome rearrangement analysis

595 Twenty five representatives of each sub-clade were *de novo* assembled using Velvet according to  
596 previously published methods (Makendi et al. 2016) and pairwise alignment carried out with Mauve  
597 (snapshot\_2015-02-25) (Darling et al. 2010). The XMFA output of Mauve was then parsed using this  
598 python script (<https://gist.github.com/flashton2003/b6c3e4e31e9084220fd30188988808f5>) which  
599 briefly, looked within contigs with more than one co-linear block and checks whether the paired

600 contig has more than one co-linear block. If so, it checks that the other co-linear blocks match  
601 between the two contigs and if not, infers a re-arrangement.

## 602 Acknowledgements

603 JND was supported by a Wellcome Trust Intermediate fellowship WT097147MA. We would like to  
604 acknowledge the contribution of the Pathogen Informatics team at the Wellcome Sanger Institute,  
605 the Sequencing team at the Wellcome Sanger Institute, Macrogen of South Korea and MRC CLIMB  
606 for providing computational capacity (Connor et al. 2016). Isolates from Laos were obtained as part  
607 of the work programme of the Lao-Oxford-Mahosot Hospital Wellcome Trust Research Unit funded  
608 by the Wellcome Trust (106698/Z/14/Z). The authors are grateful to all the laboratory and clinical  
609 staff who helped with the collection of the isolates and data.

## 610 References

- 611 Andrade-Silva LE, Ferreira-Paim K, Ferreira TB, Vilas-Boas A, Mora DJ, Manzato VM, Fonseca FM,  
612 Buosi K, Andrade-Silva J, Prudente B da S, et al. 2018. Genotypic analysis of clinical and  
613 environmental *Cryptococcus neoformans* isolates from Brazil reveals the presence of VNB  
614 isolates and a correlation with biological factors ed. K. Nielsen. *PLoS One* **13**: e0193237.  
615 <http://dx.plos.org/10.1371/journal.pone.0193237>.
- 616 Beale MA, Sabiiti W, Robertson EJ, Fuentes-Cabrejo KM, O'Hanlon SJ, Jarvis JN, Loyse A, Meintjes G,  
617 Harrison TS, May RC, et al. 2015. Genotypic diversity is associated with clinical outcome and  
618 phenotype in cryptococcal meningitis across Southern Africa. *PLoS Negl Trop Dis* **9**: 1–18.
- 619 Beardsley J, Wolbers M, Kibengo FM, Ggayi A-BM, Kamali A, Cuc NTK, Binh TQ, Chau NVV, Farrar J,  
620 Merson L, et al. 2016. Adjunctive Dexamethasone in HIV-Associated Cryptococcal Meningitis. *N*  
621 *Engl J Med* **374**: 542–554. <http://www.nejm.org/doi/10.1056/NEJMoa1509024>.
- 622 Billmyre RB, Croll D, Li W, Mieczkowski P, Carter DA, Cuomo CA, Kronstad JW, Heitman J. 2014.  
623 Highly Recombinant VGII *Cryptococcus gattii* Population Develops Clonal Outbreak Clusters

- 624 through both Sexual Macroevolution and Asexual Microevolution. *MBio* **5**: e01494-14-e01494-  
625 14. <http://mbio.asm.org/cgi/doi/10.1128/mBio.01494-14>.
- 626 Brown JKM. 2002. Aerial Dispersal of Pathogens on the Global and Continental Scales and Its Impact  
627 on Plant Disease. *Science (80- )* **297**: 537–541.  
628 <http://www.sciencemag.org/cgi/doi/10.1126/science.1072678>.
- 629 Chau TT, Mai NH, Phu NH, Nghia HD, Chuong L V, Sinh DX, Duong VA, Diep PT, Campbell JI, Baker S,  
630 et al. 2010. A prospective descriptive study of cryptococcal meningitis in HIV uninfected  
631 patients in Vietnam - high prevalence of *Cryptococcus neoformans* var *grubii* in the absence of  
632 underlying disease. *BMC Infect Dis* **10**: 199.  
633 <http://bmcinfectdis.biomedcentral.com/articles/10.1186/1471-2334-10-199>.
- 634 Chen Y, Farrer RA, Giamberardino C, Sakthikumar S, Jones A, Yang T, Tenor JL, Wagih O, Van Wyk M,  
635 Govender NP, et al. 2017. Microevolution of Serial Clinical Isolates of *Cryptococcus neoformans*  
636 var. *grubii* and *C. gattii* ed. F. Dromer. *MBio* **8**: e00166-17.  
637 <http://mbio.asm.org/lookup/doi/10.1128/mBio.00166-17>.
- 638 Connor TR, Loman NJ, Thompson S, Smith A, Southgate J, Poplawski R, Bull MJ, Richardson E, Ismail  
639 M, Thompson SE-, et al. 2016. CLIMB (the Cloud Infrastructure for Microbial Bioinformatics): an  
640 online resource for the medical microbiology community. *Microb Genomics* **2**.  
641 <http://www.microbiologyresearch.org/content/journal/mgen/10.1099/mgen.0.000086>.
- 642 Dallman T, Ashton P, Schafer U, Jironkin A, Painset A, Shaaban S, Hartman H, Myers R, Underwood A,  
643 Jenkins C, et al. 2018. SnapperDB: a database solution for routine sequencing analysis of  
644 bacterial isolates. *Bioinformatics* **81**: 3946–3952.  
645 [https://academic.oup.com/bioinformatics/advance-](https://academic.oup.com/bioinformatics/advance-article/doi/10.1093/bioinformatics/bty212/4961427)  
646 [article/doi/10.1093/bioinformatics/bty212/4961427](https://academic.oup.com/bioinformatics/advance-article/doi/10.1093/bioinformatics/bty212/4961427).
- 647 Danecek P, Auton A, Abecasis G, Albers CA, Banks E, DePristo MA, Handsaker RE, Lunter G, Marth  
648 GT, Sherry ST, et al. 2011. The variant call format and VCFtools. *Bioinformatics* **27**: 2156–2158.  
649 <https://academic.oup.com/bioinformatics/article-lookup/doi/10.1093/bioinformatics/btr330>.

- 650 Darling AE, Mau B, Perna NT. 2010. progressiveMauve: Multiple Genome Alignment with Gene Gain,  
651 Loss and Rearrangement ed. J.E. Stajich. *PLoS One* **5**: e11147.  
652 <http://dx.plos.org/10.1371/journal.pone.0011147>.
- 653 Day JN, Chau TTH, Wolbers M, Mai PP, Dung NT, Mai NH, Phu NH, Nghia HD, Phong ND, Thai CQ, et  
654 al. 2013. Combination Antifungal Therapy for Cryptococcal Meningitis. *N Engl J Med* **368**: 1291–  
655 1302. <http://www.nejm.org/doi/10.1056/NEJMoa1110404>.
- 656 Day JN, Hoang TN, Duong A V, Hong CTT, Diep PT, Campbell JI, Sieu TPM, Hien TT, Bui T, Boni MF, et  
657 al. 2011. Most Cases of Cryptococcal Meningitis in HIV-Uninfected Patients in Vietnam Are Due  
658 to a Distinct Amplified Fragment Length Polymorphism-Defined Cluster of *Cryptococcus*  
659 *neoformans* var. *grubii* VN1. *J Clin Microbiol* **49**: 658–664.  
660 <http://jcm.asm.org/cgi/doi/10.1128/JCM.01985-10>.
- 661 Day JN, Qihui S, Thanh LT, Trieu PH, Van AD, Thu NH, Chau TTH, Lan NPH, Chau NVV, Ashton PM, et  
662 al. 2017. Comparative genomics of *Cryptococcus neoformans* var. *grubii* associated with  
663 meningitis in HIV infected and uninfected patients in Vietnam ed. J.M. Vinetz. *PLoS Negl Trop*  
664 *Dis* **11**: e0005628.  
665 <http://dx.plos.org/10.1371/journal.pntd.0005628>[http://www.ncbi.nlm.nih.gov/pubmed/](http://www.ncbi.nlm.nih.gov/pubmed/28614360)  
666 [28614360](http://www.ncbi.nlm.nih.gov/pubmed/28614360).
- 667 Desjardins CA, Giamberardino C, Sykes SM, Yu C-H, Tenor JL, Chen Y, Yang T, Jones AM, Sun S,  
668 Haverkamp MR, et al. 2017. Population genomics and the evolution of virulence in the fungal  
669 pathogen *Cryptococcus neoformans*. *Genome Res* 118323.  
670 <http://genome.cshlp.org/lookup/doi/10.1101/gr.218727.116>.
- 671 Ferreira-Paim K, Andrade-Silva L, Fonseca FM, Ferreira TB, Mora DJ, Andrade-Silva J, Khan A, Dao A,  
672 Reis EC, Almeida MTG, et al. 2017. MLST-Based Population Genetic Analysis in a Global Context  
673 Reveals Clonality amongst *Cryptococcus neoformans* var. *grubii* VNI Isolates from HIV Patients  
674 in Southeastern Brazil. *PLoS Negl Trop Dis* **11**: e0005223.  
675 <http://dx.plos.org/10.1371/journal.pntd.0005223>.

- 676 Garcia-Hermoso D, Janbon G, Dromer F. 1999. Epidemiological evidence for dormant *Cryptococcus*  
677 *neoformans* infection. *J Clin Microbiol* **37**: 3204–9.  
678 <http://www.ncbi.nlm.nih.gov/pubmed/10488178>.
- 679 Hammarlöf DL, Kröger C, Owen S V., Canals R, Lacharme-Lora L, Wenner N, Schager AE, Wells TJ,  
680 Henderson IR, Wigley P, et al. 2018. Role of a single noncoding nucleotide in the evolution of an  
681 epidemic African clade of *Salmonella*. *Proc Natl Acad Sci* **115**: E2614–E2623.  
682 <http://www.pnas.org/lookup/doi/10.1073/pnas.1714718115>.
- 683 Hiremath SS, Chowdhary A, Kowshik T, Randhawa HS, Sun S, Xu J. 2008. Long-distance dispersal and  
684 recombination in environmental populations of *Cryptococcus neoformans* var. *grubii* from  
685 India. *Microbiology* **154**: 1513–1524.
- 686 Huerta-Cepas J, Dopazo J, Gabaldón T. 2010. ETE: a python Environment for Tree Exploration. *BMC*  
687 *Bioinformatics* **11**: 24. [http://bmcbioinformatics.biomedcentral.com/articles/10.1186/1471-](http://bmcbioinformatics.biomedcentral.com/articles/10.1186/1471-2105-11-24)  
688 [2105-11-24](http://bmcbioinformatics.biomedcentral.com/articles/10.1186/1471-2105-11-24).
- 689 Idnurm A, Bahn Y-S, Nielsen K, Lin X, Fraser JA, Heitman J. 2005. Deciphering the Model Pathogenic  
690 Fungus *Cryptococcus Neoformans*. *Nat Rev Microbiol* **3**: 753–764.  
691 <http://www.nature.com/doi/10.1038/nrmicro1245>.
- 692 Jombart T, Ahmed I. 2011. adegenet 1.3-1: New tools for the analysis of genome-wide SNP data.  
693 *Bioinformatics* **27**: 3070–3071.
- 694 Kaocharoen S, Ngamskulrungraj P, Firacative C, Trilles L, Piyabongkarn D, Banlunara W, Poonwan N,  
695 Chairprasert A, Meyer W, Chindamporn A. 2013. Molecular Epidemiology Reveals Genetic  
696 Diversity amongst Isolates of the *Cryptococcus neoformans/C. gattii* Species Complex in  
697 Thailand ed. B. Wanke. *PLoS Negl Trop Dis* **7**: e2297.  
698 <http://dx.plos.org/10.1371/journal.pntd.0002297>.
- 699 Khayhan K, Hagen F, Pan W, Simwami S, Fisher MC, Wahyuningsih R, Chakrabarti A, Chowdhary A,  
700 Ikeda R, Taj-Aldeen SJ, et al. 2013. Geographically Structured Populations of *Cryptococcus*  
701 *neoformans* Variety *grubii* in Asia Correlate with HIV Status and Show a Clonal Population

- 702           Structure. *PLoS One* **8**: 1–14.
- 703   Knetsch CW, Kumar N, Forster SC, Connor TR, Browne HP, Harmanus C, Sanders IM, Harris SR, Turner  
704   L, Morris T, et al. 2017. Zoonotic Transfer of *Clostridium difficile* Harboring Antimicrobial  
705   Resistance between Farm Animals and Humans ed. B. Fenwick. *J Clin Microbiol* **56**: e01384-17.  
706   <http://jcm.asm.org/lookup/doi/10.1128/JCM.01384-17>.
- 707   Koren S, Walenz BP, Berlin K, Miller JR, Bergman NH, Phillippy AM. 2017. Canu: scalable and accurate  
708   long-read assembly via adaptive k -mer weighting and repeat separation. *Genome Res* **27**: 722–  
709   736. <http://genome.cshlp.org/lookup/doi/10.1101/gr.215087.116>.
- 710   Kuyper M. 2008. *Return Migration to Vietnam*.
- 711   Li H. 2013. Aligning sequence reads, clone sequences and assembly contigs with BWA-MEM. *arXiv*.  
712   <http://arxiv.org/abs/1303.3997>.
- 713   Lin X, Heitman J. 2006. The biology of the *Cryptococcus neoformans* species complex.  
714   *AnnuRevMicrobiol* **60**: 69–105.
- 715   Lin X, Hull CM, Heitman J. 2005. Sexual reproduction between partners of the same mating type in  
716   *Cryptococcus neoformans*. *Nature* **434**: 1017–1021.  
717   <http://www.nature.com/doi/10.1038/nature03448>.
- 718   Litvintseva AP, Thakur R, Vilgalys R, Mitchell TG. 2006. Multilocus sequence typing reveals three  
719   genetic subpopulations of *Cryptococcus neoformans* var. *grubii* (serotype A), including a unique  
720   population in Botswana. *Genetics* **172**: 2223–2238.
- 721   Lorenz EN. 1963. Deterministic Nonperiodic Flow. *J Atmos Sci* **20**: 130–141.  
722   [http://journals.ametsoc.org/doi/abs/10.1175/1520-  
723   0469%281963%29020%3C0130%3ADNF%3E2.0.CO%3B2](http://journals.ametsoc.org/doi/abs/10.1175/1520-0469%281963%29020%3C0130%3ADNF%3E2.0.CO%3B2).
- 724   Ma H, Hagen F, Stekel DJ, Johnston SA, Sionov E, Falk R, Polacheck I, Boekhout T, May RC. 2009. The  
725   fatal fungal outbreak on Vancouver Island is characterized by enhanced intracellular parasitism  
726   driven by mitochondrial regulation. *Proc Natl Acad Sci* **106**: 12980–12985.  
727   <http://www.pnas.org/cgi/doi/10.1073/pnas.0902963106>.



- 728 Makendi C, Page AJ, Wren BW, Le Thi Phuong T, Clare S, Hale C, Goulding D, Klemm EJ, Pickard D,  
729 Okoro C, et al. 2016. A Phylogenetic and Phenotypic Analysis of Salmonella enterica Serovar  
730 Weltevreden, an Emerging Agent of Diarrheal Disease in Tropical Regions ed. E.T. Ryan. *PLoS*  
731 *Negl Trop Dis* **10**: e0004446. <http://dx.plos.org/10.1371/journal.pntd.0004446>.
- 732 McKenna A, Hanna M, Banks E, Sivachenko A, Cibulskis K, Kernytsky A, Garimella K, Altshuler D,  
733 Gabriel S, Daly M, et al. 2010. The Genome Analysis Toolkit: A MapReduce framework for  
734 analyzing next-generation DNA sequencing data. *Genome Res* **20**: 1297–1303.  
735 <http://genome.cshlp.org/cgi/doi/10.1101/gr.107524.110>.
- 736 Meyer M, Cox JA, Hitchings MDT, Burgin L, Hort MC, Hodson DP, Gilligan CA. 2017. Quantifying  
737 airborne dispersal routes of pathogens over continents to safeguard global wheat supply. *Nat*  
738 *Plants* **3**: 780–786. <http://www.nature.com/articles/s41477-017-0017-5>.
- 739 Nguyen L, Schmidt HA, von Haeseler A, Minh BQ. 2015. IQ-TREE: A Fast and Effective Stochastic  
740 Algorithm for Estimating Maximum-Likelihood Phylogenies. *Mol Biol Evol* **32**: 268–274.  
741 <https://academic.oup.com/mbe/article-lookup/doi/10.1093/molbev/msu300>.
- 742 Ni M, Feretzaki M, Li W, Floyd-Averette A, Mieczkowski P, Dietrich FS, Heitman J. 2013. Unisexual  
743 and Heterosexual Meiotic Reproduction Generate Aneuploidy and Phenotypic Diversity De  
744 Novo in the Yeast *Cryptococcus neoformans* ed. A.P. Mitchell. *PLoS Biol* **11**: e1001653.  
745 <http://dx.plos.org/10.1371/journal.pbio.1001653>.
- 746 Ondov BD, Treangen TJ, Melsted P, Mallonee AB, Bergman NH, Koren S, Phillippy AM. 2016. Mash:  
747 fast genome and metagenome distance estimation using MinHash. *Genome Biol* **17**: 132.  
748 <http://dx.doi.org/10.1186/s13059-016-0997-x>.
- 749 Park BJ, Wannemuehler KA, Marston BJ, Govender N, Pappas PG, Chiller TM. 2009. Estimation of the  
750 current global burden of cryptococcal meningitis among persons living with HIV/AIDS. *AIDS* **23**:  
751 525–530.  
752 [http://content.wkhealth.com/linkback/openurl?sid=WKPTLP:landingpage&an=00002030-](http://content.wkhealth.com/linkback/openurl?sid=WKPTLP:landingpage&an=00002030-200902200-00012)  
753 [200902200-00012](http://content.wkhealth.com/linkback/openurl?sid=WKPTLP:landingpage&an=00002030-200902200-00012).

- 754 Pybus OG, Rambaut A, Holmes EC, Harvey PH. 2002. New inferences from tree shape: numbers of  
755 missing taxa and population growth rates. *Syst Biol* **51**: 881–8.  
756 <http://www.ncbi.nlm.nih.gov/pubmed/12554454>.
- 757 Rajasingham R, Smith RM, Park BJ, Jarvis JN, Govender NP, Chiller TM, Denning DW, Loyse A,  
758 Boulware DR. 2017. Global burden of disease of HIV-associated cryptococcal meningitis: an  
759 updated analysis. *Lancet Infect Dis* **17**: 873–881. [http://dx.doi.org/10.1016/S1473-](http://dx.doi.org/10.1016/S1473-3099(17)30243-8)  
760 [3099\(17\)30243-8](http://dx.doi.org/10.1016/S1473-3099(17)30243-8).
- 761 Rhodes J, Desjardins CA, Sykes SM, Beale MA, Vanhove M, Sakthikumar S, Chen Y, Gujja S, Saif S,  
762 Chowdhary A, et al. 2017. Tracing Genetic Exchange and Biogeography of *Cryptococcus*  
763 *neoformans* var. *grubii* at the Global Population Level. *Genetics* **207**: 327–346.  
764 <http://www.genetics.org/lookup/doi/10.1534/genetics.117.203836>.
- 765 Sahl JW, Pearson T, Okinaka R, Schupp JM, Gillece JD, Heaton H, Birdsell D, Hepp C, Fofanov V,  
766 Noseda R, et al. 2016. A *Bacillus anthracis* Genome Sequence from the Sverdlovsk 1979  
767 Autopsy Specimens. *MBio* **7**: e01501-16.  
768 <http://mbio.asm.org/lookup/doi/10.1128/mBio.01501-16>.
- 769 Schäfer B. 2005. RNA maturation in mitochondria of *S. cerevisiae* and *S. pombe*. *Gene* **354**: 80–85.  
770 <http://linkinghub.elsevier.com/retrieve/pii/S037811190500168X>.
- 771 Shaw MW. 1994. Modeling Stochastic Processes in Plant Pathology. *Annu Rev Phytopathol* **32**: 523–  
772 544. <http://www.annualreviews.org/doi/10.1146/annurev.py.32.090194.002515>.
- 773 Simwami SP, Khayhan K, Henk DA, Aanensen DM, Boekhout T, Hagen F, Brouwer AE, Harrison TS,  
774 Donnelly CA, Fisher MC. 2011. Low Diversity *Cryptococcus neoformans* Variety *grubii* Multilocus  
775 Sequence Types from Thailand Are Consistent with an Ancestral African Origin ed. J. Heitman.  
776 *PLoS Pathog* **7**: e1001343. <http://dx.plos.org/10.1371/journal.ppat.1001343>.
- 777 Stamatakis A. 2014. RAxML version 8: a tool for phylogenetic analysis and post-analysis of large  
778 phylogenies. *Bioinformatics* **30**: 1312–1313. [https://academic.oup.com/bioinformatics/article-](https://academic.oup.com/bioinformatics/article-lookup/doi/10.1093/bioinformatics/btu033)  
779 [lookup/doi/10.1093/bioinformatics/btu033](https://academic.oup.com/bioinformatics/article-lookup/doi/10.1093/bioinformatics/btu033).

- 780 Thanh LT, Trieu PH, Rattanaovong S, Trinh MN, Anh D Van, Dacon C, Thu HN, Lan PHN, Chau THT,  
781 Davong V, et al. 2017. Multilocus Sequence Typing Reveals a Unique Co-dominant Population  
782 Structure of *Cryptococcus neoformans* var. *grubii* in Vietnam. *bioRxiv*.
- 783 Thorpe HA, Bayliss SC, Hurst LD, Feil EJ. 2017. Comparative Analyses of Selection Operating on  
784 Nontranslated Intergenic Regions of Diverse Bacterial Species. *Genetics* **206**: 363–376.  
785 <http://www.genetics.org/lookup/doi/10.1534/genetics.116.195784>.
- 786 Vanhove M, Beale MA, Rhodes J, Chanda D, Lakhi S, Kwenda G, Molloy S, Karunaharan N, Stone N,  
787 Harrison TS, et al. 2017. Genomic epidemiology of *Cryptococcus* yeasts identifies adaptation to  
788 environmental niches underpinning infection across an African HIV/AIDS cohort. *Mol Ecol* **26**:  
789 1991–2005. <http://doi.wiley.com/10.1111/mec.13891>.
- 790 Velagapudi R, Hsueh Y-P, Geunes-Boyer S, Wright JR, Heitman J. 2009. Spores as Infectious  
791 Propagules of *Cryptococcus neoformans*. *Infect Immun* **77**: 4345–4355.  
792 <http://iai.asm.org/cgi/doi/10.1128/IAI.00542-09>.
- 793 Voelz K, Johnston SA, Smith LM, Hall RA, Idnurm A, May RC. 2014. ‘Division of labour’ in response to  
794 host oxidative burst drives a fatal *Cryptococcus gattii* outbreak. *Nat Commun* **5**: 5194.  
795 <http://www.nature.com/doi/10.1038/ncomms6194>.
- 796 Walker BJ, Abeel T, Shea T, Priest M, Abouelliel A, Sakthikumar S, Cuomo CA, Zeng Q, Wortman J,  
797 Young SK, et al. 2014. Pilon: An Integrated Tool for Comprehensive Microbial Variant Detection  
798 and Genome Assembly Improvement ed. J. Wang. *PLoS One* **9**: e112963.  
799 <http://dx.plos.org/10.1371/journal.pone.0112963>.
- 800 Wiesner DL, Moskalenko O, Corcoran JM, McDonald T, Rolfes MA, Meya DB, Kajumbula H, Kambugu  
801 A, Bohjanen PR, Knight JF, et al. 2012. Cryptococcal Genotype Influences Immunologic  
802 Response and Human Clinical Outcome after Meningitis. *MBio* **3**: e00196-12-e00196-12.  
803 <http://mbio.asm.org/cgi/doi/10.1128/mBio.00196-12>.  
804
